# Supplementary material
Source: publisher figshare collection journal article supplement (https://tandf.figshare.com/ndownloader/files/21556842)
Supplement: Supplementary file 1 [file 21556842]

## Supplementary Material

**Supplemental table I. Patients with major adverse cardiac events**

|                                                  | <b>Culprit<br/>lesion<br/>related<br/>events</b> | <b>Non-culprit<br/>lesion<br/>related<br/>events</b> | <b>Indeterminat<br/>e events</b> | <b>Non-culprit<br/>lesion<br/>related and<br/>indeterminat<br/>e events<br/>combined</b> | <b>All<br/>events</b> |
|--------------------------------------------------|--------------------------------------------------|------------------------------------------------------|----------------------------------|------------------------------------------------------------------------------------------|-----------------------|
| Composite of major adverse cardiac events, n     | 11                                               | 27                                                   | 18                               | 45                                                                                       | 56                    |
| Death from any cause, n                          | 1                                                | 1                                                    | 16                               | 17                                                                                       | 18                    |
| Definite cardiac or unexplained sudden death, n  | 1                                                | 1                                                    | 6                                | 7                                                                                        | 8                     |
| Acute coronary syndrome, n                       | 3                                                | 9                                                    | 2                                | 11                                                                                       | 14                    |
| Myocardial infarction, n                         | 2                                                | 3                                                    | 2                                | 5                                                                                        | 7                     |
| Elective coronary revascularization, n           | 7                                                | 17                                                   | 0                                | 17                                                                                       | 24                    |
| Composite of death or acute coronary syndrome, n | 4                                                | 10                                                   | 18                               | 28                                                                                       | 32                    |

## Supplemental figure I. Patient inclusion

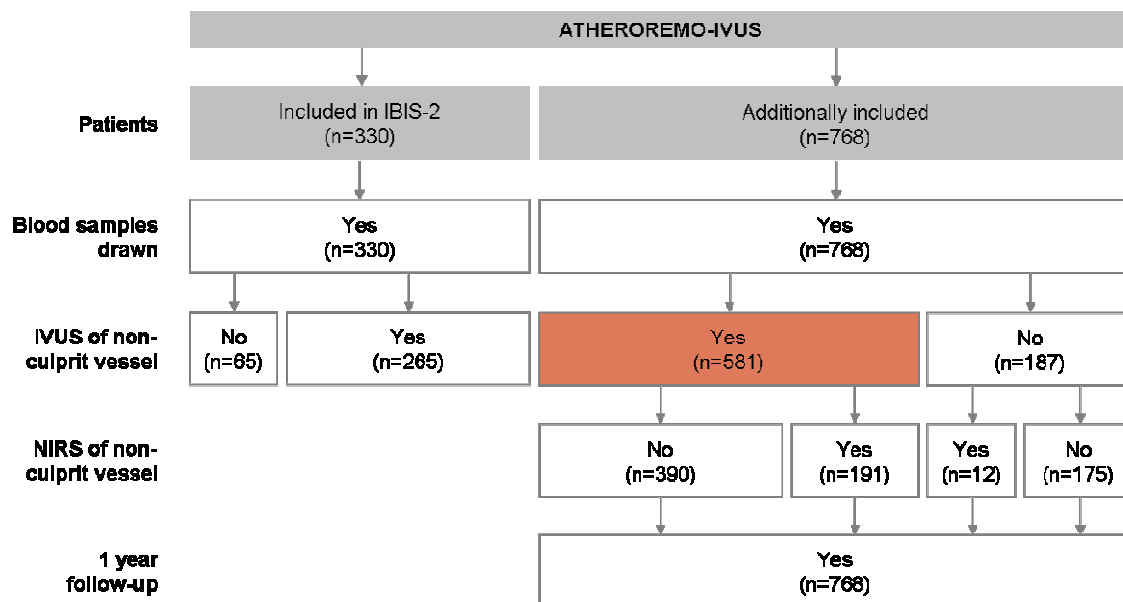

Patients were included in the current study analyses when the following criteria were met: 1. not participating in the IBIS-2 trial; 2. IVUS of a non-culprit coronary artery was performed; and 3. plasma samples were available for biomarker measurements. In patients who were additionally included at Erasmus MC (n=768), IVUS of a non-culprit coronary artery was performed in 581 patients (red shaded). In these patients, blood samples were available in 570 patients.

IBIS-2 indicates Integrated Biomarker and Imaging Study-2; IVUS, intravascular ultrasound; NIRS, near-infrared spectroscopy; n.a., not applicable.

**Supplemental figure II. Methodology for detection of lesion and reference segments**

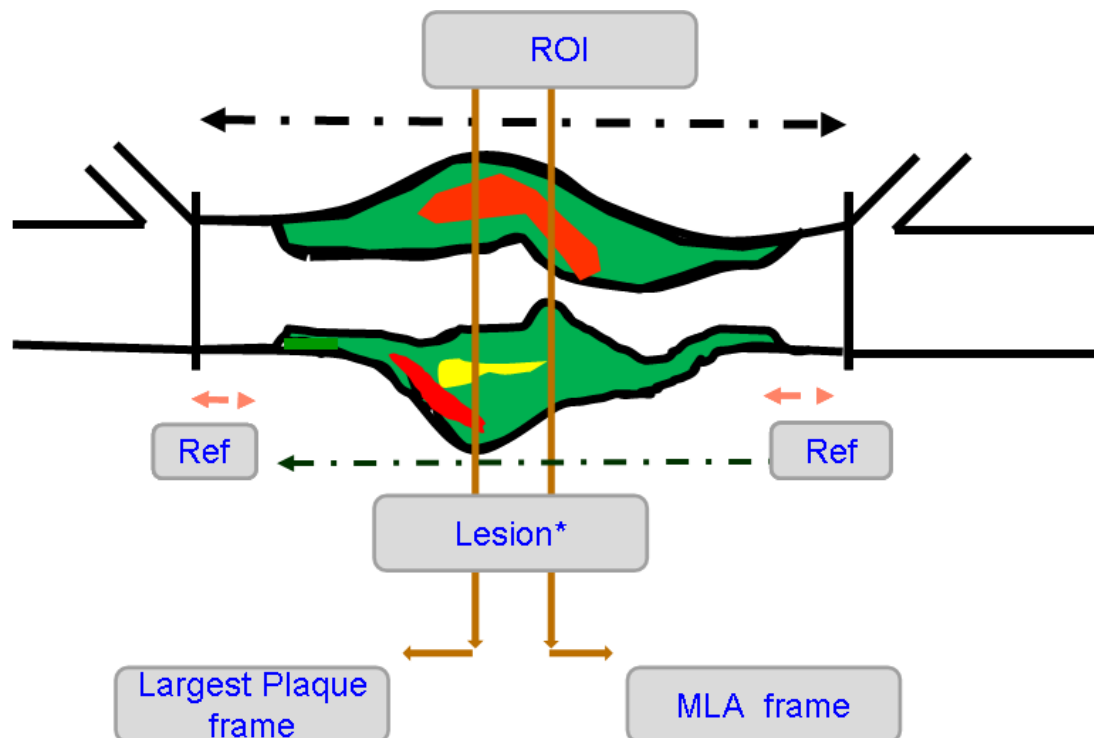

**\* : all consecutive frames with more than 40% of plaque burden**

MLA indicates minimal luminal area, REF, reference segments; ROI, region of interest.
